# Supplementary material for: Both direct and indirect suppression of MCL1 synergizes with BCLXL inhibition in preclinical models of gastric cancer
Source: Springer Nature journal article supplement (doi:10.1038/s41419-025-07481-8), 2025-03-12
Supplement: MOESM2 [file 41419_2025_7481_MOESM2_ESM.pdf]

**Table S1. Patient information**

| Patient ID | Study ID | Gender | Diagnosis Age(y) | Pathological diagnosis                        | Lauren subtype | TNM stages     | Previous Rx | Tumor site | TP53 mutation | MSI/MSS status |
|------------|----------|--------|------------------|-----------------------------------------------|----------------|----------------|-------------|------------|---------------|----------------|
| P1         | PDO#1    | Female | 42               | Poorly differentiated adenocarcinoma          | Mixed          | cT4aN3bM0 IIIB | FOLFOX4     | Corpus     | 90%+          | MSI            |
| P2         | PDO#2    | Female | 47               | Poorly differentiated adenocarcinoma          | Diffuse        | cT4aN1M0 IIIA  | nil         | antrum     | 40%+          | MSS            |
| P3         | PDO#3    | Male   | 58               | Poorly differentiated tubular adenocarcinoma  | Mixed          | cT4aN3aM0 IIIB | nil         | antrum     | 90%+          | MSS            |
| P4         | PDO#4    | Male   | 42               | Poorly differentiated adenocarcinoma          | Diffuse        | cT4aN2M0 IIIB  | nil         | antrum     | WT            | MSS            |
| P5         | PDO#5    | Male   | 53               | Poorly differentiated adenocarcinoma          | Diffuse        | cT3N3aM0 IIIB  | nil         | Corpus     | 80%+          | MSS            |
| P6         | PDO#6    | Female | 49               | Poorly differentiated tubular adenocarcinoma  | Intestinal     | cT4aN1M0 IIIB  | nil         | antrum     | 80%+          | MSI            |
| P7         | PDX#1    | Male   | 66               | Poorly differentiated mucinous adenocarcinoma | Diffuse        | cT4aN2M1 IVB   | nil         | antrum     | <20%+         | MSS            |
| P8         | PDX#2    | Male   | 59               | Poorly differentiated adenocarcinoma          | Intestinal     | cT3N3M0 IIIB   | Sox         | antrum     | ND            | ND             |

ND: not determined
